# Supplementary material
Source: publisher figshare collection journal article supplement (https://wiley.figshare.com/articles/dataset/_/3554496)
Supplement: Supplementary file 1 [file 1 › appendix-G.htm]

Ecological Archives E093-220-A7


*Ecological Archives* E093-220-A7

Roland Langrock, Ruth King, Jason Matthiopoulos, Len Thomas, Daniel Fortin, Juan M. Morales. 2012. Flexible and practical modeling of animal telemetry data: hidden Markov models and extensions. *Ecology* 93:2336–2342. http://dx.doi.org/10.1890/11-2241.1

Appendix G. Verification of the HMM representation being an approximate representation of the example HSMM given in the section *Extensions: Other formulations of the state process*.

> View / download PDF.


---

[Back to E093-220]
