# Supplementary material
Source: publisher figshare collection journal article supplement (https://wiley.figshare.com/articles/dataset/_/3554496)
Supplement: Supplementary file 1 [file 1 › appendix-G.pdf]

Roland Langrock, Ruth King, Jason Matthiopoulos, Len Thomas, Daniel Fortin, and Juan M. Morales. 2012. Flexible and practical modeling of animal telemetry data: hidden Markov models and extensions. *Ecology* 93:2336–2342. <http://dx.doi.org/10.1890/11-2241.1>

Appendix G. Verification of the HMM representation being an approximate representation of the example HSMM given in Section 4.1.

We show that

$$p_1^*(r) = p_1(r), \quad \text{for } r \leq N^*,$$

where  $p_1^*(r)$  denotes the p.m.f. of the dwell-time distribution in state aggregate  $I$  of the approximating HMM, and  $p_1(r)$  denotes the p.m.f. of the dwell-time distribution in state 1 of the HSMM that is to be approximated. First of all, we note that a stay in state aggregate  $I$  begins in state 1 (follows from the definitions of the HMM state transition probabilities in the  $(N^* + 1)$ th row of  $\Gamma$  and of the initial state distribution). Consequently,

$$p_1^*(1) = \gamma_{1,N^*+1} = c(1) = p_1(1)$$

$$p_1^*(2) = \gamma_{12} \cdot \gamma_{2,N^*+1} = (1 - c(1)) \cdot c(2) = (1 - p_1(1)) \cdot \frac{p_1(2)}{1 - p_1(1)} = p_1(2)$$

$$\begin{aligned} p_1^*(3) &= \gamma_{12} \cdot \gamma_{23} \cdot \gamma_{3,N^*+1} = (1 - c(1)) \cdot (1 - c(2)) \cdot c(3) \\ &= (1 - p_1(1)) \cdot \frac{1 - p_1(1) - p_1(2)}{1 - p_1(1)} \cdot \frac{p_1(3)}{1 - p_1(1) - p_1(2)} = p_1(3) \end{aligned}$$

⋮

$$\begin{aligned} p_1^*(N^*) &= \gamma_{12} \cdot \gamma_{23} \cdot \dots \cdot \gamma_{N^*-1,N^*} \cdot \gamma_{N^*,N^*+1} \\ &= (1 - c(1)) \cdot (1 - c(2)) \cdot \dots \cdot (1 - c(N^* - 1)) \cdot c(N^*) \\ &= (1 - p_1(1)) \frac{1 - p_1(1) - p_1(2)}{1 - p_1(1)} \cdot \dots \\ &\quad \cdot \frac{1 - p_1(1) - p_1(2) - \dots - p_1(N^* - 1)}{1 - p_1(1) - \dots - p_1(N^* - 2)} \\ &\quad \cdot \frac{p_1(N^*)}{1 - p_1(1) - p_1(2) - \dots - p_1(N^* - 1)} = p_1(N^*) \end{aligned}$$

Alternatively, the statement can be proven via induction (Langrock and Zucchini 2011).

#### LITERATURE CITED

Langrock, R., and W. Zucchini. 2011. Hidden Markov models with arbitrary dwell-time distributions. *Computational Statistics and Data Analysis* 55:715–724.
